# Supplementary material for: Comparison between 20 and 30 meters in walkway length affecting the 6-minute walk test in patients with chronic obstructive pulmonary disease: A randomized crossover study
Source: PubMed Central journal article supplement (PMC8741022; doi:10.1371/journal.pone.0262238), 2022-01-07
Supplement: pone.0262238.s005.pdf [file pone.0262238.s005.pdf]

## เอกสารชี้แจงข้อมูลแก่ผู้เข้าร่วมโครงการวิจัย

ชื่อโครงการ การเปรียบเทียบผลการทดสอบการเดิน 6 นาที ในผู้ป่วยโรคปอดอุดกั้นเรื้อรัง ระหว่างความยาวของทางเดิน 20 เมตรกับ 30 เมตร

ชื่อผู้วิจัย นายอภิวัฒน์ ภูทองไชย

ที่อยู่ หน่วยตรวจวินิจฉัยทางการแพทย์ โรงพยาบาลธรรมศาสตร์เฉลิมพระเกียรติ

โทรศัพท์มือถือ 092-5549614 E-mail: pu.apiwat@hotmail.com

ชื่อผู้ร่วมในโครงการวิจัย

ชื่อ นายกรรณกร อินทรขำ

ที่อยู่ หน่วยตรวจวินิจฉัยทางการแพทย์ โรงพยาบาลธรรมศาสตร์เฉลิมพระเกียรติ

โทรศัพท์มือถือ 094-2692524 E-mail: intharakham@hotmail.com

ชื่อ ผู้ช่วยศาสตราจารย์ นายแพทย์ณรงค์กร ช้ายโพธิ์กลาง

ที่อยู่ หน่วยตรวจวินิจฉัยทางการแพทย์ โรงพยาบาลธรรมศาสตร์เฉลิมพระเกียรติ และ หน่วยโรคระบบการหายใจ และเวชบำบัดวิกฤต ภาควิชาอายุรศาสตร์ คณะแพทยศาสตร์ มหาวิทยาลัยธรรมศาสตร์

โทรศัพท์มือถือ 089-6909558 E-mail: M\_Narongkorn@hotmail.com

เรียน ผู้เข้าร่วมโครงการวิจัยทุกท่าน

ท่านได้รับเชิญให้เข้าร่วมในโครงการวิจัยนี้เนื่องจากท่านได้รับการวินิจฉัยเป็นโรคปอดอุดกั้นเรื้อรัง ก่อนที่ท่านจะตัดสินใจเข้าร่วมในการศึกษาวิจัยดังกล่าว ขอให้ท่านอ่านเอกสารฉบับนี้อย่างถี่ถ้วน เพื่อให้ท่านได้ทราบถึงเหตุผลและรายละเอียดของการศึกษาวิจัยในครั้งนี้

ท่านสามารถขอคำแนะนำในการเข้าร่วมโครงการวิจัยนี้จากครอบครัว เพื่อน หรือแพทย์ประจำตัวของท่านได้ ท่านมีเวลาอย่างเพียงพอในการตัดสินใจโดยอิสระ ถ้าท่านตัดสินใจแล้วว่าจะเข้าร่วมในโครงการวิจัยนี้ ขอให้ท่านลงนามในเอกสารแสดงความยินยอมของโครงการวิจัยนี้

เวอร์ชันที่ 2 (แก้ไขครั้งที่ 1) วันที่ 22 กุมภาพันธ์ 2561

คณะกรรมการจริยธรรมการวิจัยในคน

16 มีนาคม 2561

อนุมัติ

1. เหตุที่ต้องทำวิจัยและเหตุผลที่ต้องการศึกษาในคน

เนื่องจากการทดสอบการเดิน 6 นาที เป็นการทดสอบด้วยการเดินออกกำลังกายที่มีความหนักระดับเดียวกับการทำกิจวัตรประจำวัน ทำได้ง่ายไม่ยุ่งยาก จึงสามารถนำไปประเมินความสามารถในการทำงานของระบบหายใจในผู้ป่วยโรคปอดอุดกั้นเรื้อรังได้ ในการแนะนำของระยะทางการเดินที่เหมาะสมอยู่ที่ 30 เมตร แต่ในทางเวชปฏิบัติจริง ภายในหน่วยงานไม่มีระยะทางความยาวที่เพียงพอต่อการทดสอบ จึงมีความสนใจในการวิจัยเปรียบเทียบผลต่อการทดสอบการเดิน 6 นาทีระหว่างระยะทางเดิน 20 เมตรและ 30 เมตรในผู้ป่วยโรคปอดอุดกั้นเรื้อรัง เพื่อศึกษาและนำไปประยุกต์ใช้ในอนาคต

2. วัตถุประสงค์ของโครงการ

เพื่อศึกษาเปรียบเทียบผลต่อการทดสอบการเดิน 6 นาทีระหว่างระยะทางเดิน 20 เมตรและ 30 เมตรในผู้ป่วยโรคปอดอุดกั้นเรื้อรัง ได้แก่ ระยะทางทั้งหมด สัญญาณชีพ และคะแนนการเหนื่อย

3. ประโยชน์ที่อาสาสมัครจะได้รับ

ไม่มีประโยชน์โดยตรงต่ออาสาสมัครผู้เข้าร่วมวิจัย

4. จำนวนผู้เข้าร่วมการวิจัยทั้งสิ้น 50 คน

5. ระยะเวลาที่จะทำวิจัยทั้งสิ้น 1 ปี

6. หากท่านตัดสินใจเข้าร่วมการวิจัยแล้ว ผู้วิจัยจะขอให้ท่านมาทำการทดสอบการเดิน 6 นาทีและเก็บข้อมูลเป็นระยะเวลา 1 วัน โดยจะทำการเดินทั้งหมด 2 ครั้ง ครั้งที่หนึ่งจะเดินบนทางเดินที่มีระยะทาง 20 เมตร หลังจากเสร็จการทดสอบครั้งที่หนึ่งแล้ว จะให้ท่านนั่งพักให้หายเหนื่อยและสัญญาณชีพกลับมาอยู่ในสภาวะปกติ จากนั้นจะไปทดสอบการเดินในครั้งที่สอง โดยจะเดินบนทางเดินที่มีระยะทาง 30 เมตร ซึ่งทั้งสองการเดิน ท่านจะต้องเดินเร็วเท่าที่จะทำได้ แต่ไม่วิ่ง นอกจากนั้นจะมีการเก็บข้อมูลต่าง ๆ ที่วัดได้จากการทดสอบการเดิน ได้แก่ ระยะทางทั้งหมดที่ได้จากการเดิน ความดันโลหิต การเปลี่ยนแปลงของสัญญาณชีพ ระดับค่าออกซิเจนในร่างกาย และคะแนนของการเหนื่อย หากท่านมีอาการเหนื่อยจนเดินไม่ไหว สามารถหยุดพักและถือว่าสิ้นสุดการทดสอบทันที

7. ข้อมูลที่ได้จากการเก็บข้อมูล ผู้วิจัยจะใช้รหัสแทนชื่อและข้อมูลส่วนตัวของท่าน และจะดำเนินการทำลายข้อมูลตลอดจนข้อมูลอื่นๆ ที่เกี่ยวข้องกับท่านภายหลังเสร็จสิ้นการวิจัย

ความเสี่ยงที่อาจจะเกิดขึ้นเมื่อเข้าร่วมการวิจัย อาจเกิดการหายใจเหนื่อยหอบ หรือมีผลต่อการทำงานของหัวใจ หากท่านรู้สึกอึดอัด หรือรู้สึกไม่สบายใจ ท่านมีสิทธิ์ถอนตัวออกจากโครงการนี้เมื่อใดก็ได้ โดยไม่ต้องแจ้งให้ทราบล่วงหน้า และการไม่เข้าร่วมวิจัยหรือถอนตัวออกจากโครงการวิจัยนี้ จะไม่มีผลกระทบต่อแผนการรักษาตามปกติของท่าน

8. ข้อมูลส่วนตัวของท่านจะถูกเก็บรักษาไว้ ไม่เปิดเผยต่อสาธารณะเป็นรายบุคคล แต่จะรายงานผลการวิจัยเป็นข้อมูลส่วนรวม ผู้ที่มีสิทธิ์เข้าถึงข้อมูลของท่านจะมีเฉพาะผู้ที่เกี่ยวข้องกับการวิจัยนี้ และคณะกรรมการจริยธรรมการวิจัยในคน มหาวิทยาลัยธรรมศาสตร์ ชุดที่ 2 เท่านั้น

คณะกรรมการจริยธรรมการวิจัยในคน  
เวอร์ชันที่ 2 (แก้ไขครั้งที่ 1) วันที่ 22 กุมภาพันธ์ 2561

16 มีนาคม 2561

อนุมัติ

#### 9. การป้องกันและการรักษาอาการข้างเคียง

ถ้าหากท่านมีอาการเหนื่อยหอบ ใจสั่น หายใจไม่ออกรุนแรง ปวดขาเป็นตะคริวมาก เจ็บ หน้าอก เวียนศีรษะ หน้ามืด หรือตาพร่ามัว ในขณะที่ทดสอบ ผู้วิจัยจะให้หยุดทดสอบทันที โดยจะให้อาสาสมัครนั่งพักจนมีอาการดีขึ้น แต่หากประเมินแล้วว่าอาการไม่ดี ผู้วิจัยจะแจ้งอาจารย์แพทย์ที่ปรึกษาวิจัยหรือแพทย์เจ้าของไข้ประเมินทันทีเพื่อให้การรักษาที่เหมาะสม

#### 10. ความรับผิดชอบของผู้ทำวิจัย/ผู้สนับสนุนการวิจัยเมื่อเกิดภาวะแทรกซ้อน

กรณีที่ท่านได้รับอันตรายหรือเจ็บป่วยที่เป็นผลจากการศึกษา ผู้วิจัยและทีมแพทย์จะให้การดูแลรักษาท่าน โดยท่านไม่ต้องเสียค่าใช้จ่ายใดๆ ทั้งนี้ ผู้วิจัยจะคำนึงถึงด้านร่างกายและภาวะโรคของผู้ป่วยระหว่างการศึกษาลดเวลา และพร้อมที่จะให้การดูแล สังเกตการณ์ และแก้ไขปัญหาย่างทันถ่วงที

#### 11. การวิจัยครั้งนี้ ท่านจะได้รับค่าเดินทางและค่าเสียเวลาในวันเก็บข้อมูล ท่านละ 200 บาท

#### 12. หากท่านมีข้อสงสัยที่จะสอบถามเกี่ยวกับการวิจัยนี้ ท่านสามารถติดต่อไปยัง นายอภิวัฒน์ ภูทองไชย, นายกรรณกร อินทรจำ หรือ ผู้ช่วยศาสตราจารย์ นายแพทย์ณรงค์กร ชัยโพธิ์กลาง ได้ตลอดเวลาที่หน่วยตรวจวินิจฉัยทางการแพทย์ โรงพยาบาลธรรมศาสตร์เฉลิมพระเกียรติ เบอร์ 02-9269265

### สิทธิของผู้เข้าร่วมในโครงการวิจัย

ในฐานะที่ท่านเป็นผู้เข้าร่วมในโครงการวิจัย ท่านจะมีสิทธิดังต่อไปนี้

1. ท่านจะได้รับทราบถึงลักษณะและวัตถุประสงค์ของการวิจัยในครั้งนี้
2. ท่านจะได้รับการอธิบายเกี่ยวกับระเบียบวิธีการของการวิจัยทางการแพทย์ที่ใช้ในการวิจัยครั้งนี้
3. ท่านจะได้รับการอธิบายถึงความเสี่ยงและความไม่สบายที่จะได้รับจากการวิจัย
4. ท่านจะได้รับการอธิบายถึงประโยชน์ที่ท่านอาจจะได้รับจากการวิจัย
5. ท่านจะมีโอกาสได้ซักถามเกี่ยวกับงานวิจัยหรือขั้นตอนที่เกี่ยวข้องกับงานวิจัย
6. ท่านจะได้รับทราบว่ากรยินยอมเข้าร่วมในโครงการวิจัยนี้ ท่านสามารถขอถอนตัวจากโครงการเมื่อไรก็ได้ โดยผู้เข้าร่วมในโครงการวิจัยสามารถขอถอนตัวจากโครงการ โดยไม่ได้รับผลกระทบต่อแผนการรักษา
7. ท่านจะได้รับสำเนาเอกสารข้อมูลคำอธิบายสำหรับผู้เข้าร่วมในโครงการวิจัยและเอกสารยินยอมที่มีทั้งลายเซ็นและวันที่
8. ท่านมีสิทธิในการตัดสินใจว่าจะเข้าร่วมในโครงการวิจัยหรือไม่ก็ได้ โดยปราศจากการใช้สิทธิพลบังคับ ข่มขู่ หรือการหลอกลวง

คณะกรรมการจริยธรรมการวิจัยในคน  
เวอร์ชันที่ 2 (แก้ไขครั้งที่ 1) วันที่ 22 กุมภาพันธ์ 2561

16 มีนาคม 2561

อนุมัติ

โครงการวิจัยนี้ได้รับการรับรองจากคณะกรรมการจริยธรรมการวิจัยในคน มหาวิทยาลัยธรรมศาสตร์ ชุดที่ 2 หากท่านไม่ได้รับการรักษาพยาบาลหรือการชดเชยอันควรต่อการบาดเจ็บหรือเจ็บป่วยที่เกิดขึ้นโดยตรงจากการวิจัย หรือท่านไม่ได้รับการปฏิบัติตามที่ปรากฏในเอกสารข้อมูลคำอธิบายสำหรับผู้เข้าร่วมในการวิจัย ท่านสามารถติดต่อกับประธานคณะกรรมการฯ หรือผู้แทน ได้ที่สำนักงานคณะกรรมการจริยธรรมการวิจัยในคน มหาวิทยาลัยธรรมศาสตร์ ชุดที่ 2 งานวางแผนและบริหารงานวิจัย กองบริหารการวิจัย อาคารสำนักงาน อธิการบดี ชั้น 3 โทรศัพท์/โทรสาร 0-2564-4440-79 ต่อ 1804

คณะกรรมการจริยธรรมการวิจัยในคน  
เวอร์ชันที่ 2 (แก้ไขครั้งที่ 1) วันที่ 22 กุมภาพันธ์ 2561  
มธ. ชุดที่ 2

16 มีนาคม 2561

อนุมัติ
