# Supplementary material for: Comparison between 20 and 30 meters in walkway length affecting the 6-minute walk test in patients with chronic obstructive pulmonary disease: A randomized crossover study
Source: PubMed Central journal article supplement (PMC8741022; doi:10.1371/journal.pone.0262238), 2022-01-07
Supplement: pone.0262238.s007.pdf [file pone.0262238.s007.pdf]

## หนังสือแสดงเจตนายินยอมเข้าร่วมการวิจัย

โครงการวิจัยเรื่อง การเปรียบเทียบผลการทดสอบการเดิน 6 นาที ในผู้ป่วยโรคปอดอุดกั้นเรื้อรัง ระหว่าง  
ความยาวของทางเดิน 20 เมตรกับ 30 เมตร

วันที่ให้คำยินยอม.....

ข้าพเจ้า (นาย/นาง/นางสาว).....

ขอทำหนังสือนี้ไว้ต่อหน้าหัวหน้าโครงการเพื่อเป็นหลักฐานแสดงว่า

ข้อ 1. ก่อนลงนามในหนังสือแสดงเจตนายินยอมเข้าร่วมการวิจัยนี้ ข้าพเจ้าและญาติได้รับการอธิบายจากผู้ขอความยินยอมให้ทราบถึงวัตถุประสงค์ของการวิจัย กิจกรรมการวิจัย ความเสี่ยง รวมทั้งประโยชน์ที่อาจเกิดขึ้นจากการวิจัยอย่างละเอียด และมีความเข้าใจดีแล้ว

ข้อ 2 ผู้วิจัยรับรองว่าจะตอบคำถามต่าง ๆ ที่ข้าพเจ้าและญาติสงสัยด้วยความเต็มใจ ไม่ปิดบังซ่อนเร้น จนข้าพเจ้าและญาติพอใจ

ข้อ 3 ข้าพเจ้าเข้าร่วม โครงการวิจัยนี้โดยสมัครใจ และข้าพเจ้าหรือญาติมีสิทธิที่จะบอกเลิกการเข้าร่วมในโครงการวิจัยนี้เมื่อใดก็ได้ และการบอกเลิกการเข้าร่วมวิจัยนี้จะไม่ผลกระทบต่อแผนการรักษาที่ข้าพเจ้าจะพึงได้รับต่อไป

ข้อ 4 ผู้วิจัยรับรองว่า จะเก็บข้อมูลเฉพาะเกี่ยวกับตัวข้าพเจ้าเป็นความลับ และจะเปิดเผยได้เฉพาะในรูปที่เป็นสรุปผลการวิจัย การเปิดเผยข้อมูลเกี่ยวกับตัวข้าพเจ้าต่อหน่วยงานต่าง ๆ ที่เกี่ยวข้องกระทำได้เฉพาะกรณีจำเป็นด้วยเหตุผลทางวิชาการเท่านั้น

ข้อ 5 ผู้วิจัยรับรองว่า หากมีข้อมูลเพิ่มเติมที่ส่งผลกระทบต่อการศึกษา ข้าพเจ้าและญาติจะได้รับการแจ้งให้ทราบทันทีโดยไม่ปิดบัง ซ่อนเร้น

ข้าพเจ้าได้อ่านข้อความข้างต้นแล้วมีความเข้าใจดีทุกประการ และได้ลงนามในใบยินยอมนี้ด้วยความเต็มใจ

ลงนาม.....ผู้ให้ความยินยอม

(.....)

...../...../.....

ลงนาม.....ผู้ขอความยินยอม

(.....)

...../...../.....

ลงนาม.....ญาติของผู้ให้ความยินยอม

(.....) เกี่ยวข้องเป็น.....

...../...../.....

ลงนาม.....พยาน

(.....)

...../...../.....

เวอร์ชันที่ 2 (แก้ไขครั้งที่ 1) วันที่ 22 กุมภาพันธ์ 2561

คณะกรรมการจริยธรรมการวิจัยในคน

มธ. ชุดที่ 2

16 มีนาคม 2561

อนุมัติ
